# Supplementary material
Source: publisher figshare collection journal article supplement (https://acs.figshare.com/ndownloader/files/3737578)

**Supporting Information:**

**$\gamma$ -PARCEL: Control of Molecular Release Using  $\gamma$ -Rays.**

Shuhei Murayama,<sup>a</sup> Jun-ichiro Jo,<sup>a</sup> Kazutaka Arai,<sup>a</sup> Fumihiko Nishikido,<sup>a</sup> Rumiana Bakalova,<sup>a</sup> Taiga Yamaya,<sup>a</sup> Tsuneo Saga,<sup>a</sup> Masaru Kato,<sup>b</sup> and Ichio Aoki,<sup>a\*</sup>

<sup>a</sup> Molecular Imaging Center, National Institute of Radiological Sciences, 4-9-1 Anagawa, Inage-ku, Chiba 263-8555, Japan

<sup>b</sup> Graduate School of Pharmaceutical Sciences and GPLLI Program The University of Tokyo, 7-3-1 Hongo, Bunkyo-ku, Tokyo 113-0033, Japan.

**Figure S1  $^1\text{H}$ -NMR spectrum, integrated value of the nanoparticles**

The  $\gamma$ -ray-responsive nanoparticles by combining 16 mM PEG-SS-Ac (50  $\mu\text{L}$ ), PEG-Ac (150  $\mu\text{L}$ ), water (50  $\mu\text{L}$ ), 0.1 M APS (50  $\mu\text{L}$ ), and 0.1 M TEMED (50  $\mu\text{L}$ ) in that order at room temperature and subsequently vortexing the mixture for 20 min to obtain a dispersion of nanoparticles. The  $^1\text{H}$  NMR spectrum of the nanoparticle to calculate binding rate.

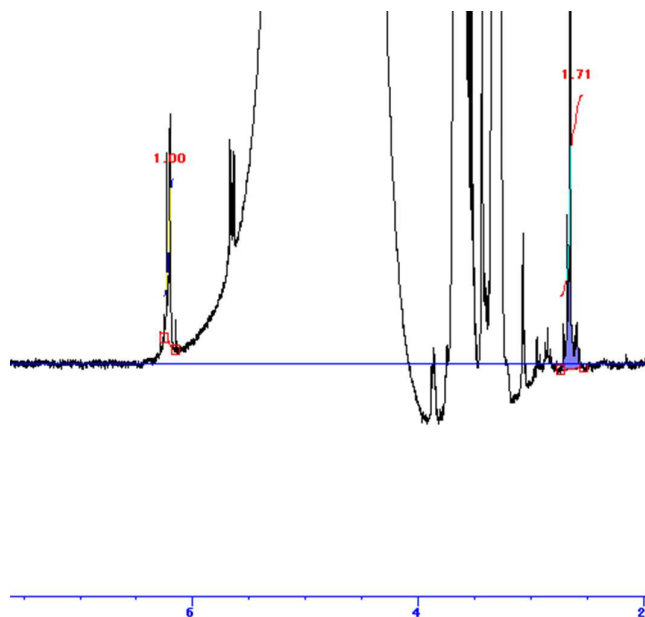

**Figure S2 Attenuation rate of  $\gamma$ -ray muscle tissue from swine**

$\gamma$ -Ray attenuation rate was measured 3 minutes, to get average dose,  
Blue: background, Red: without tissue, Yellow: with tissue.

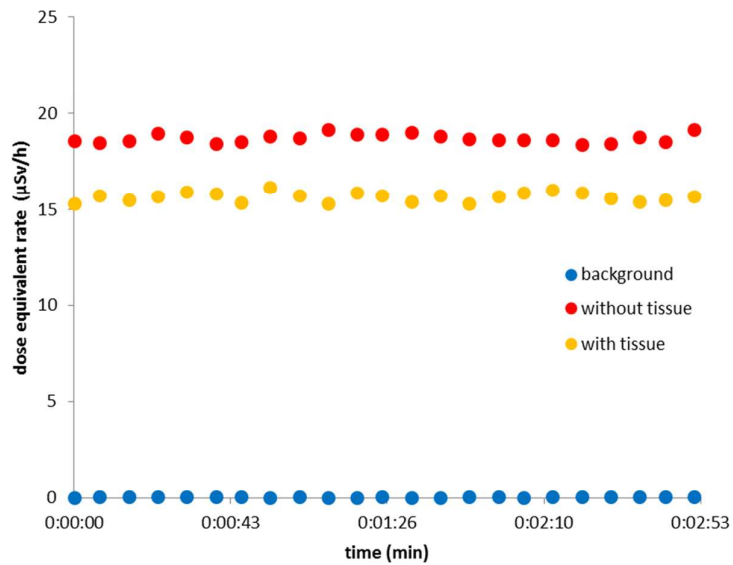

**Figure. S3 Calibration curve of the absorbance of Nile blue**

Nile blue (concentration 0.1, 0.05, 0.01, 0.005, 0 mg/mL) was poured into a 96-well plate. Then, the absorbance signal (638 nm) was measured with a multiplate reader.

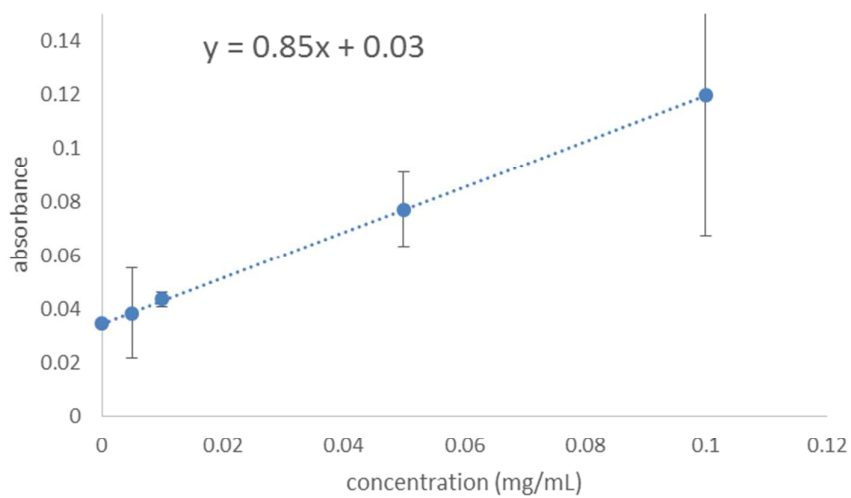

Supplement: Supplementary file 1 [file 3737578]
